# Supplementary material for: n-Type conducting P doped ZnO thin films via chemical vapor deposition
Source: Royal Society of Chemistry journal article supplement (doi:10.1039/d0ra05667g), 2020-01-01
Supplement: d0ra05667g1.pdf [file d0ra05667g1.pdf]

## n-Type Conducting P doped ZnO Thin Films via Chemical Vapor Deposition

Donglei Zhao, Jianwei Li, Sanjayan Sathasivam and Claire J. Carmalt\*

\*Corresponding author

Materials Chemistry Centre, Department of Chemistry, University College London,  
20 Gordon Street, London WC1H 0AJ, UK

Fax: (+44) 20-7679-7463

E-mail: [c.j.carmalt@ucl.ac.uk](mailto:c.j.carmalt@ucl.ac.uk)

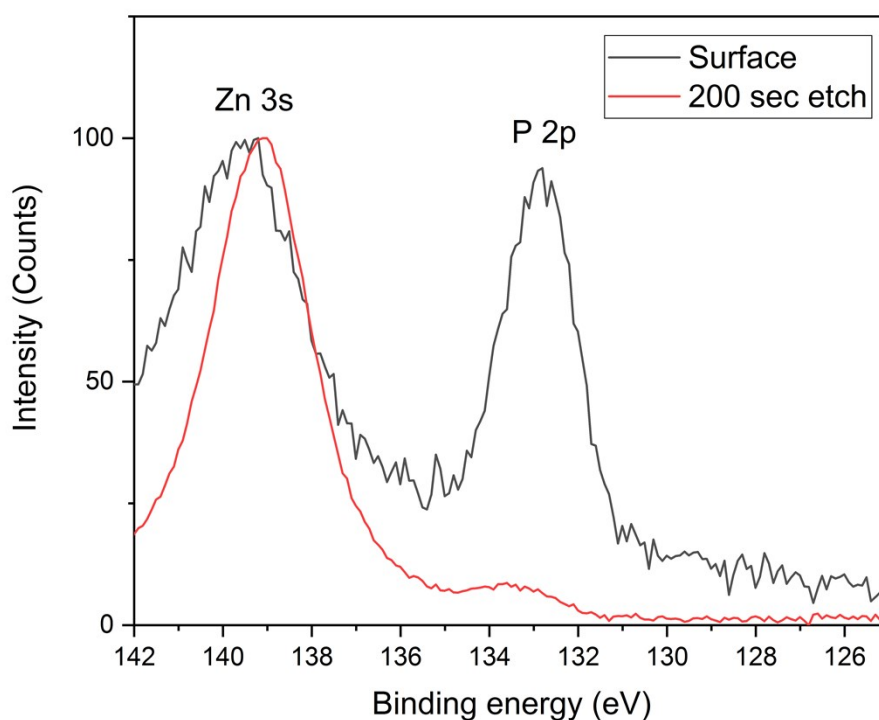

**Figure S1: Depth profiling of the 14.3 at.% P doped ZnO films showing P to be highly surface segregated. XPS results show 52% P relative to Zn on the surface and only 2% after 200 seconds of etching**
